# Supplementary material
Source: PubMed Central journal article supplement (PMC3656608)

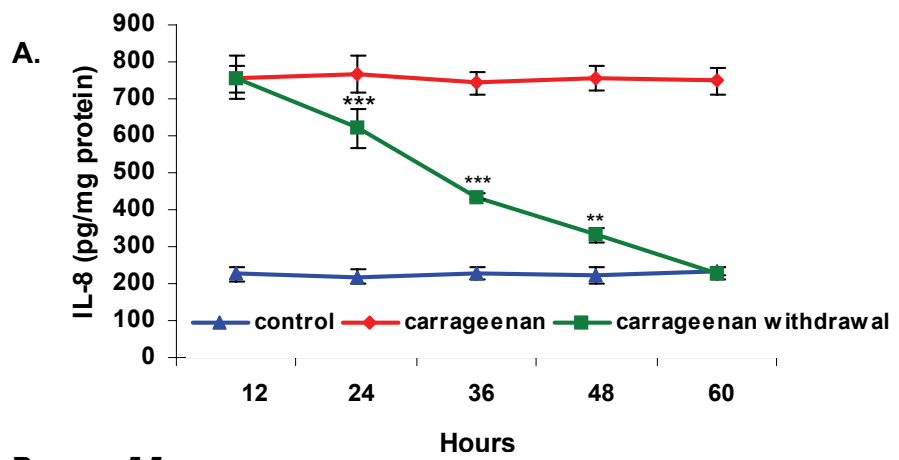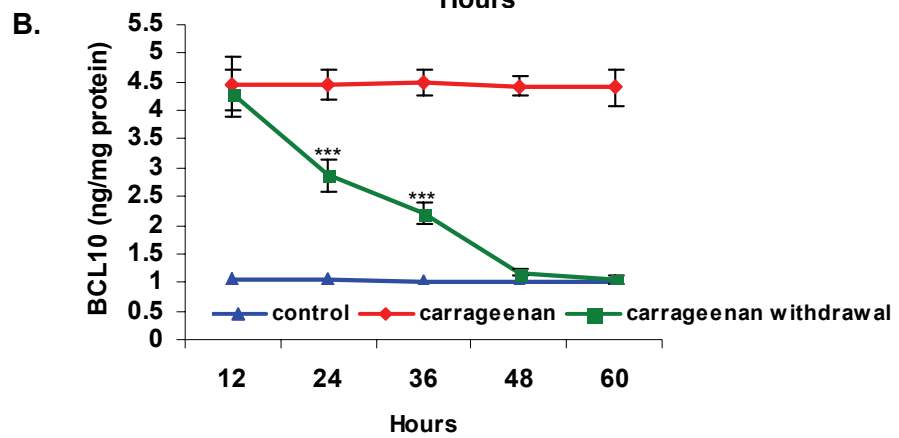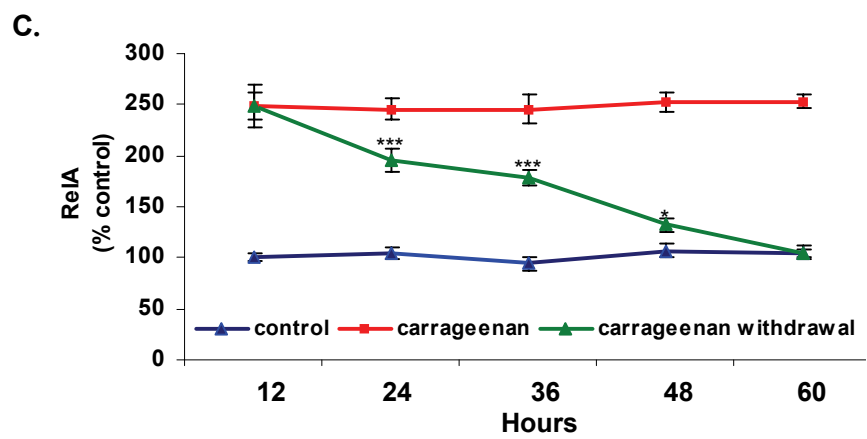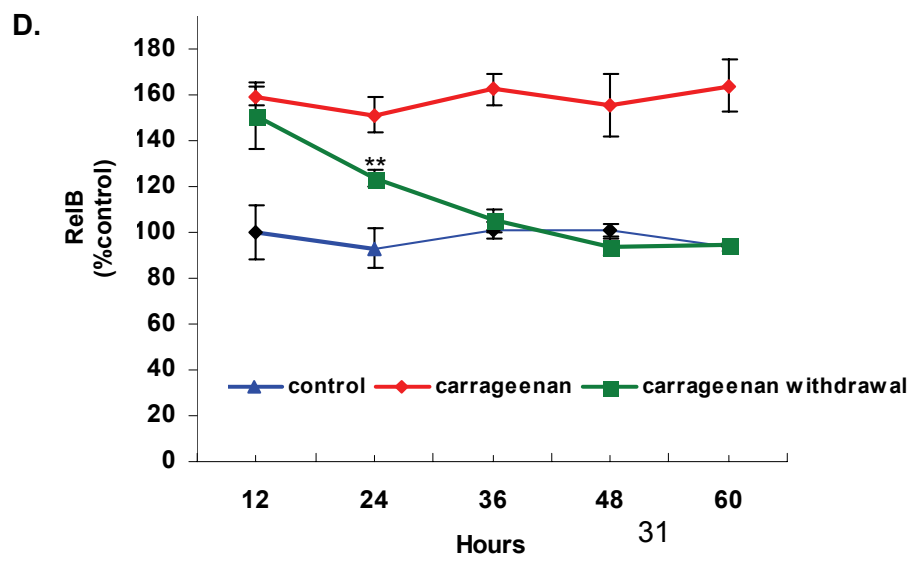

Supplement: NIHMS465675-supplement-01.pdf [file NIHMS465675-supplement-01.pdf]

Supplementary Table 2.

HT-29 Cells

A.

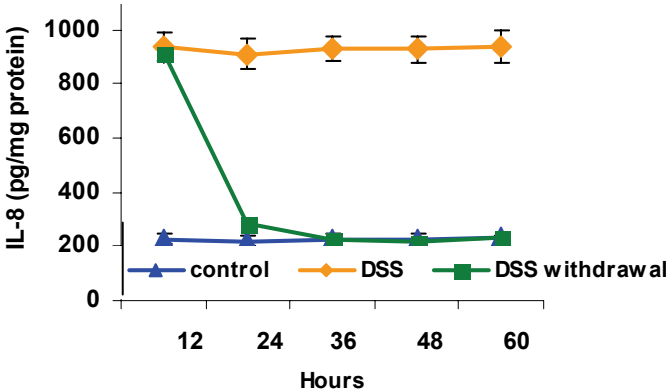

B.

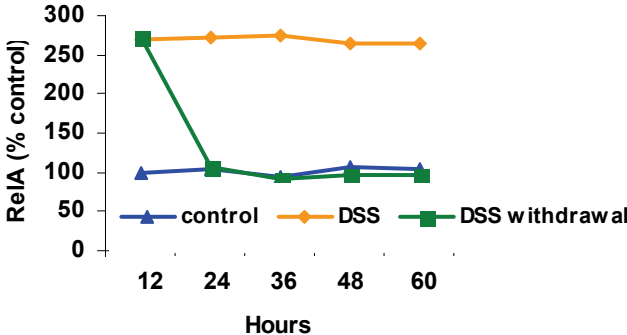

Supplement: NIHMS465675-supplement-02.pdf [file NIHMS465675-supplement-02.pdf]
